# Supplementary material for: Co/CoO nanoparticles armored by N-doped nanoporous carbon polyhedrons towards glucose oxidation in high-performance non-enzymatic sensors
Source: Royal Society of Chemistry journal article supplement (doi:10.1039/d2nj02490j), 2022-01-01
Supplement: d2nj02490j1.pdf [file d2nj02490j1.pdf]

## Co/CoO Nanoparticles armored by N-doped nanoporous carbon polyhedrons towards glucose oxidation in high-performance non-enzymatic sensor

Li Yan, Dandan Chu, Xue-Qiang Chu, Danhua Ge,\* Xiaojun Chen\*

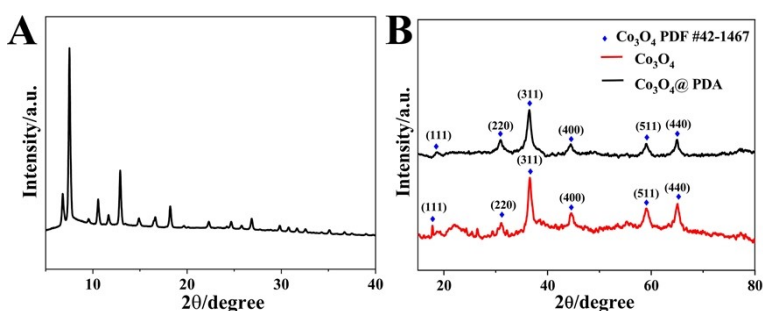

Fig. S1. XRD patterns of ZIF-67 (A), Co<sub>3</sub>O<sub>4</sub> and Co<sub>3</sub>O<sub>4</sub>@PDA (B).

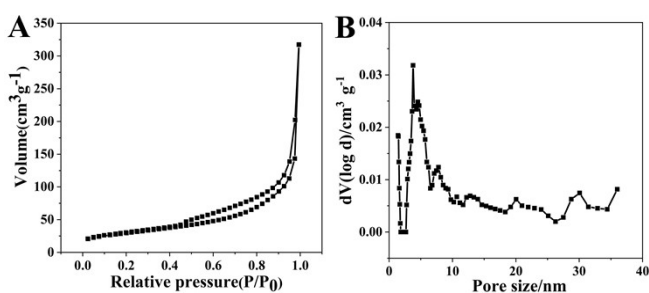

Fig. S2. (A) N<sub>2</sub> adsorption/desorption isotherm and (B) pore size distribution of Co/CoO/N-C.

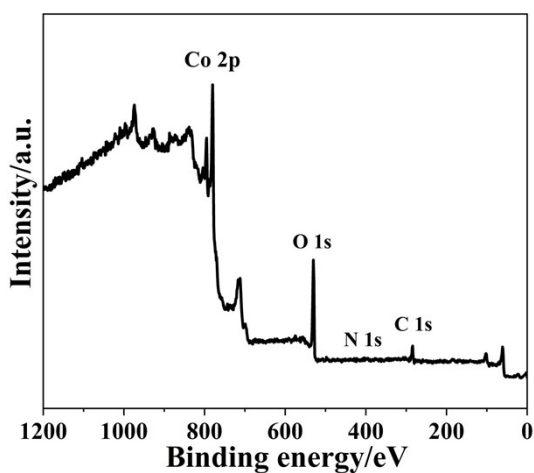

Fig. S3. XPS spectra of Co/CoO/N-C survey.

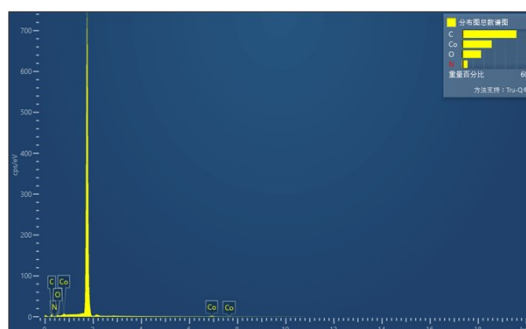

**Fig. S4.** EDS analysis of Co/CoO/N-C.

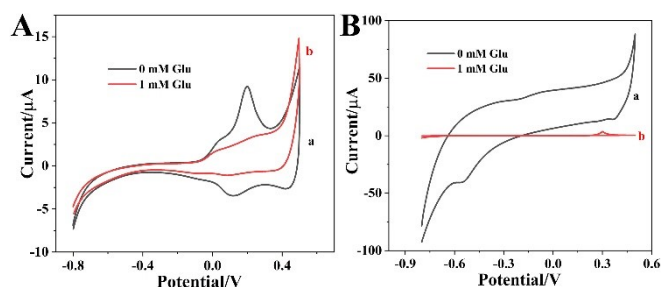

**Fig. S5.** CVs of ZIF-67/ITO (A) and  $\text{Co}_3\text{O}_4$ /ITO (B) in 0.2 M NaOH without (black line) and with (red line) 1 mM glucose, scan rate:  $50 \text{ mV s}^{-1}$ .

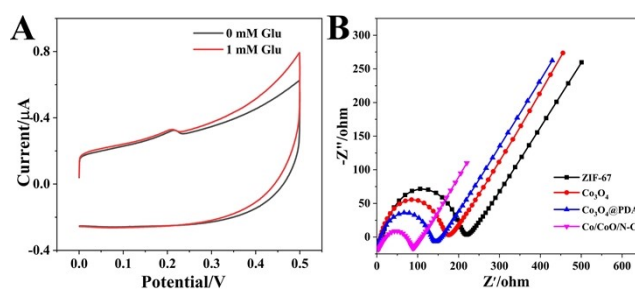

**Fig. S6.** The CVs of ZIF-67@PDA after pyrolysis in  $\text{N}_2$  without and with 1 mM glucose in 0.2 M NaOH (A). EIS spectra of the ZIF-67/ITO,  $\text{Co}_3\text{O}_4$ /ITO,  $\text{Co}_3\text{O}_4$ @PDA/ITO and Co/CoO/N-C/ITO in 5 mM  $\text{K}_3\text{Fe}(\text{CN})_6/\text{K}_4\text{Fe}(\text{CN})_6$  solution containing 0.1 M KCl with frequency between 100 kHz and 0.01 Hz (B).

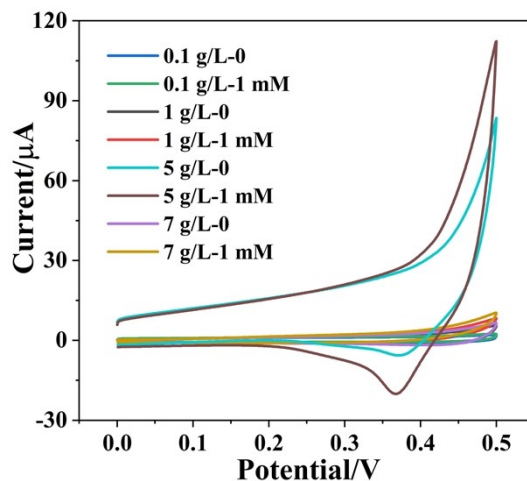

**Fig. S7.** The effects of the concentration of  $\text{Co}_3\text{O}_4$  in Tris-buffer solution on the electrochemical performance.

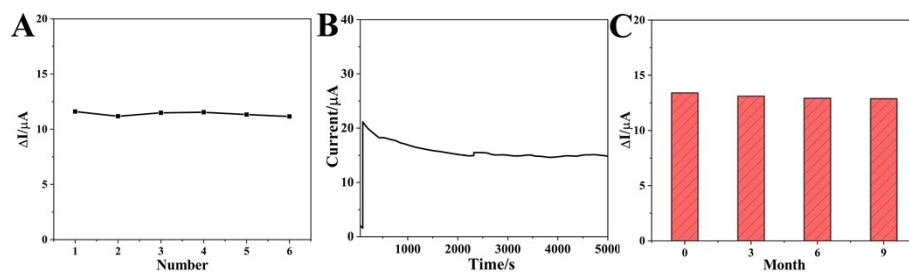

**Fig. S8.** (A) Results of six repetitive measurements of 1 mM glucose. (B) Amperometric response obtained at Co/CoO/N-C/ITO on addition of 1 mM glucose into 0.6 M NaOH at +0.55 V. (C) The stability of the Co/CoO/N-C/ITO towards 1 mM glucose in a period of 9 months.
